# Supplementary material for: Novel Insights into the Downstream Pathways and Targets Controlled by Transcription Factors CREM in the Testis
Source: PubMed Central journal article supplement (PMC3285179; doi:10.1371/journal.pone.0031798), 2012-02-22

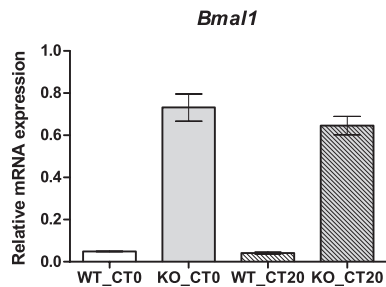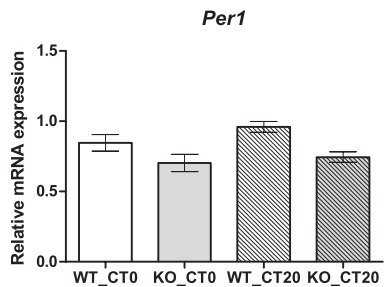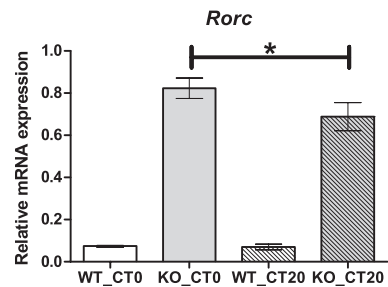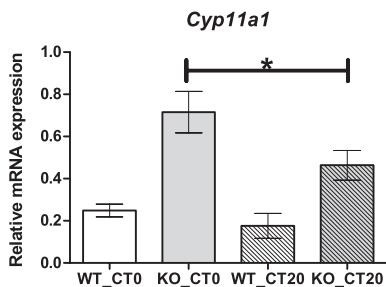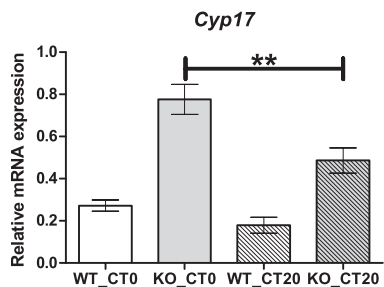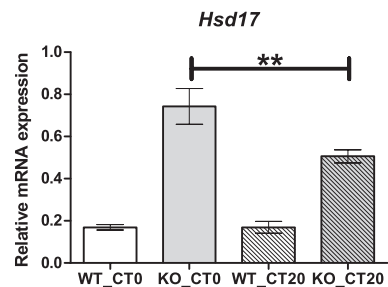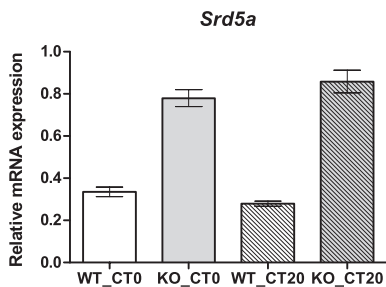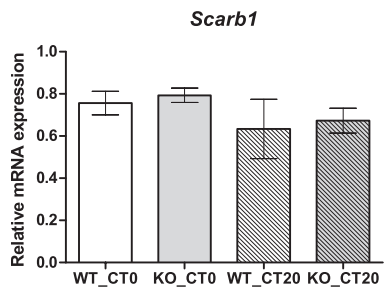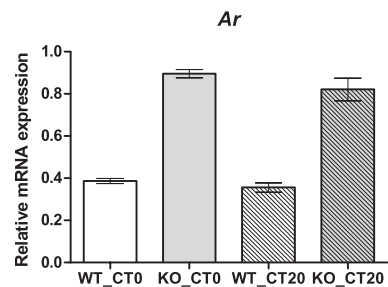

Supplement: pone.0031798.s004.pdf [file pone.0031798.s004.pdf]
