# Supplementary material for: Novel Insights into the Downstream Pathways and Targets Controlled by Transcription Factors CREM in the Testis
Source: PLoS One. 2012 Feb 22;7(2):e31798. doi: 10.1371/journal.pone.0031798 (PMC3285179; doi:10.1371/journal.pone.0031798)
Supplement: Table S3 — A list of genes found in the cross-section between DE genes from Beissbarth et al. dataset and DE genes from Kosir et al. dataset. (XLS) [file pone.0031798.s008.xls]

## Sheet: Table S3
Table S3: A list of genes found in the cross-section between DE genes from Beissbarth et al. dataset and DE genes from Kosir et al. dataset.
Probe	Symbol	Description	GenBank	t-statistic	p-value	Fold Change
10417794	1810063B07Rik	RIKEN cDNA 1810063B07 gene	NM_026209	-12.47	0	-1.34
10402752	2010107E04Rik	RIKEN cDNA 2010107E04 gene	NM_027360	-7.88	0	-0.88
10590452	Abhd5	abhydrolase domain containing 5	NM_026179	-8.45	0	-1.53
10426284	Acr	acrosin prepropeptide	NM_013455	-4.86	0	-0.51
10401244	Actn1	actinin, alpha 1	NM_134156	5.08	0	0.5
10450484	Aif1	allograft inflammatory factor 1	NM_019467	-19.68	0	-2.81
10389701	Akap1	A kinase (PRKA) anchor protein 1	NM_009648	-28.36	0	-3.75
10395825	Aldoart2	aldolase 1, A isoform, retrogene 2	NR_003959	-7.98	0	-0.93
10418766	Ankrd28	ankyrin repeat domain 28	NM_001024604	5.84	0	0.99
10560624	Apoe	apolipoprotein E	NM_009696	3.17	0.003	0.6
10512145	Aqp7	aquaporin 7	NM_007473	-7.56	0	-3.83
10493267	Arhgef2	rho/rac guanine nucleotide exchange factor (GEF) 2	NM_008487	-36.45	0	-3.63
10556463	Arntl	aryl hydrocarbon receptor nuclear translocator-like	NM_007489	6.47	0	1.37
10363403	Ascc1	activating signal cointegrator 1 complex subunit 1	NM_026937	-5.63	0	-0.77
10543067	Asns	asparagine synthetase	NM_012055	-3.78	0.001	-2.1
10595793	Atp1b3	ATPase, Na+/K+ transporting, beta 3 polypeptide	NM_007502	-21.95	0	-1.69
10478109	BC054059	cDNA sequence BC054059	NM_145635	-4.77	0	-2.71
10561369	BC089491	cDNA sequence BC089491	NM_175033	-8.1	0	-0.98
10494910	Bcas2	breast carcinoma amplified sequence 2	NM_026602	-5.06	0	-0.43
10423080	C1qtnf3	C1q and tumor necrosis factor related protein 3	NM_030888	6.31	0	0.91
10583676	Carm1	coactivator-associated arginine methyltransferase 1	NM_021531	-10.15	0	-1.27
10474223	Cd59b	CD59b antigen	NM_181858	-9.38	0	-1.65
10569429	Cdkn1c	cyclin-dependent kinase inhibitor 1C (P57)	NM_001161624	-4.24	0	-0.57
10536563	Cftr	cystic fibrosis transmembrane conductance regulator homolog	NM_021050	-9.95	0	-1.33
10540298	Chl1	cell adhesion molecule with homology to L1CAM	NM_007697	-3.51	0.001	-0.38
10371616	Chpt1	choline phosphotransferase 1	NM_144807	-3.78	0.001	-1.38
10487371	Ciao1	cytosolic iron-sulfur protein assembly 1 homolog (S. cerevisiae)	NM_025296	6.73	0	0.69
10555550	Clpb	ClpB caseinolytic peptidase B homolog (E. coli)	NM_009191	-12.43	0	-1.8
10398996	Crip2	cysteine rich protein 2	NM_024223	-5.45	0	-1.02
10364824	Csnk1g2	casein kinase 1, gamma 2	NM_134002	-20.21	0	-2.33
10476915	Cst8	cystatin 8 (cystatin-related epididymal spermatogenic)	NM_009978	-19.6	0	-4.03
10454851	Cxxc5	CXXC finger 5	NM_133687	-14.06	0	-1.47
10572616	Dda1	DET1 and DDB1 associated 1	NM_025600	-9.54	0	-1.39
10356457	Dnajb3	DnaJ (Hsp40) homolog, subfamily B, member 3	NM_008299	-3.94	0	-0.62
10533182	Dtx1	deltex 1 homolog (Drosophila)	NM_008052	5.13	0	0.67
10449284	Dusp1	dual specificity phosphatase 1	NM_013642	-4.85	0	-1.11
10565486	Eed	embryonic ectoderm development	NM_021876	2.71	0.01	0.51
10602795	Eif1ay	eukaryotic translation initiation factor 1A, Y-linked	NM_025437	-5.09	0	-0.87
10488589	Fam110a	family with sequence similarity 110, member A	NM_028666	-9.41	0	-1.39
10546661	Foxp1	forkhead box P1	NM_053202	5.1	0	0.76
10419038	Ghitm	growth hormone inducible transmembrane protein	NM_078478	-3.31	0.002	-0.44
10472162	Gpd2	glycerol phosphate dehydrogenase 2, mitochondrial	NM_010274	-5.6	0	-2.03
10562360	Gpi1	glucose phosphate isomerase 1	NM_008155	-16.4	0	-2.43
10548769	Gsg1	germ cell-specific gene 1	NM_010352	-18.6	0	-1.67
10472782	Hat1	histone aminotransferase 1	NM_026115	3.49	0.001	0.72
10574087	Herpud1	homocysteine-inducible, endoplasmic reticulum stress-inducible, ubiquitin-like domain member 1	NM_022331	-12.17	0	-1.82
10403951	Hist1h2bp	histone cluster 1, H2bp	NM_178202	-4.04	0	-0.37
10500559	Hsd3b6	hydroxy-delta-5-steroid dehydrogenase, 3 beta- and steroid delta-isomerase 6	NM_013821	2.85	0.007	0.54
10444591	Hspa1l	heat shock protein 1-like	NM_013558	-28.33	0	-5.14
10574427	Impdh2	inosine 5'-phosphate dehydrogenase 2	NM_011830	-7.51	0	-1.8
10393387	Jmjd6	jumonji domain containing 6	NM_033398	-13.17	0	-0.96
10572456	Jund	Jun proto-oncogene related gene d	NM_010592	-6.25	0	-0.91
10594251	Kif23	kinesin family member 23	NM_024245	5.73	0	0.49
10432378	Lmbr1l	limb region 1 like	NM_029098	-4.58	0	-0.43
10416800	Lmo7	LIM domain only 7	NM_201529	7.4	0	1.04
10429100	Lrrc6	leucine rich repeat containing 6 (testis)	NM_019457	5.41	0	0.7
10377541	Lsmd1	LSM domain containing 1	NM_030083	-7.25	0	-1.04
10424676	Ly6e	lymphocyte antigen 6 complex, locus E	NM_008529	7.54	0	0.85
10344624	Lypla1	lysophospholipase 1	NM_008866	-10.92	0	-1.97
10569927	Map2k7	mitogen-activated protein kinase kinase 7	NM_001042557	-7.81	0	-0.81
10462791	March5	membrane-associated ring finger (C3HC4) 5	NM_027314	-3.02	0.005	-0.37
10445601	Mea1	male enhanced antigen 1	NM_010787	-2.99	0.005	-0.41
10492469	Mlf1	myeloid leukemia factor 1	NM_001039543	-3.66	0.001	-0.59
10389022	Myo1d	myosin ID	NM_177390	5.16	0	0.64
10579119	Ndufa13	NADH dehydrogenase (ubiquinone) 1 alpha subcomplex, 13	NM_023312	-6.83	0	-1.08
10483809	Nfe2l2	nuclear factor, erythroid derived 2, like 2	NM_010902	13.99	0	1.79
10506893	Nrd1	nardilysin, N-arginine dibasic convertase, NRD convertase 1	NM_146150	-4.42	0	-0.64
10423798	Odf1	outer dense fiber of sperm tails 1	NM_008757	-16.91	0	-1.65
10496638	Odf2l	outer dense fiber of sperm tails 2-like	NM_001162538	3.96	0	1.15
10412345	Parp8	poly (ADP-ribose) polymerase family, member 8	NM_001081009	4.61	0	0.91
10502446	Pdha2	pyruvate dehydrogenase E1 alpha 2	NM_008811	-4.1	0	-0.59
10605711	Pdk3	pyruvate dehydrogenase kinase, isoenzyme 3	NM_145630	-12.63	0	-1.8
10448424	Pdpk1	3-phosphoinositide dependent protein kinase-1	NM_011062	-13.08	0	-1.71
10377439	Per1	period homolog 1 (Drosophila)	NM_001159367	-3.11	0.004	-0.5
10450923	Pgk2	phosphoglycerate kinase 2	NM_031190	-5.18	0	-0.59
10453429	Pigf	phosphatidylinositol glycan anchor biosynthesis, class F	NM_008838	-8.3	0	-1.1
10585932	Pkm2	pyruvate kinase, muscle	NM_011099	-9.3	0	-1.35
10514221	Plin2	perilipin 2	NM_007408	-6.83	0	-1.06
10396358	Ppm1a	protein phosphatase 1A, magnesium dependent, alpha isoform	NM_008910	-15.44	0	-1.64
10458645	Ppp2r2b	protein phosphatase 2 (formerly 2A), regulatory subunit B (PR 52), beta isoform	NM_028392	-27.06	0	-2.58
10607475	Prdx4	peroxiredoxin 4	NM_016764	-13.3	0	-2.25
10418410	Prkcd	protein kinase C, delta	NM_011103	-22.79	0	-3.22
10404287	Prl3c1	prolactin family 3, subfamily c, member 1	NM_013766	27.54	0	3.31
10437677	Prm3	protamine 3	NM_013638	-28.02	0	-3.03
10395816	Psma6	proteasome (prosome, macropain) subunit, alpha type 6	NM_011968	-11.89	0	-1.16
10461408	Rab3il1	RAB3A interacting protein (rabin3)-like 1	NM_144538	-17.11	0	-2.09
10420131	Rabggta	Rab geranylgeranyl transferase, a subunit	NM_019519	10.61	0	1.01
10430748	Rangap1	RAN GTPase activating protein 1	NM_011241	-17.94	0	-2.1
10460461	Rbm4b	RNA binding motif protein 4B	NM_025717	-21.7	0	-1.63
10516894	Rcc1	regulator of chromosome condensation 1	NM_133878	-19.37	0	-2.09
10444505	Rdbp	RD RNA-binding protein	NM_001045864	-3.8	0.001	-0.53
10364784	Reep6	receptor accessory protein 6	NM_139292	-5.66	0	-2.12
10454202	Rnf138	ring finger protein 138	NM_207623	-6.12	0	-1.07
10450206	Rnf5	ring finger protein 5	NM_019403	-6.62	0	-0.68
10348670	Rnpepl1	arginyl aminopeptidase (aminopeptidase B)-like 1	NM_181405	-13.72	0	-2.13
10508012	Rspo1	R-spondin homolog (Xenopus laevis)	NM_138683	10.22	0	1.05
10480999	Sdccag3	serologically defined colon cancer antigen 3	NM_026563	-23.27	0	-1.36
10400515	Sec23a	SEC23A (S. cerevisiae)	NM_009147	-6.88	0	-1.03
10380067	Sept4	septin 4	NM_011129	-22.09	0	-3.11
10418702	Sh3bp5	SH3-domain binding protein 5 (BTK-associated)	NM_011894	-5.8	0	-0.43
10543054	Shfm1	split hand/foot malformation (ectrodactyly) type 1	NM_009169	5.51	0	0.69
10372988	Slc16a7	solute carrier family 16 (monocarboxylic acid transporters), member 7	NM_011391	-11.1	0	-2.39
10499906	Smcp	sperm mitochondria-associated cysteine-rich protein	NM_008574	-18.14	0	-2.24
10528484	Srpk2	serine/arginine-rich protein specific kinase 2	NM_009274	-5.59	0	-1.33
10393166	St6galnac2	ST6 (alpha-N-acetyl-neuraminyl-2,3-beta-galactosyl-1,3)-N-acetylgalactosaminide alpha-2,6-sialyltransferase 2	NM_009180	-9.66	0	-1.54
10469335	Stam	signal transducing adaptor molecule (SH3 domain and ITAM motif) 1	NM_011484	5.6	0	0.92
10555460	Stard10	START domain containing 10	NM_019990	-23.79	0	-3.31
10346168	Stat4	signal transducer and activator of transcription 4	NM_011487	-11.22	0	-1.6
10573451	Syce2	synaptonemal complex central element protein 2	NM_027954	-14.02	0	-1.68
10592342	Tbrg1	transforming growth factor beta regulated gene 1	NM_025289	-3.87	0	-0.38
10536483	Tes	testis derived transcript	NM_207176	-5.51	0	-0.54
10504316	Tesk1	testis specific protein kinase 1	NM_011571	-3.88	0	-0.43
10591653	Tmem205	transmembrane protein 205	NM_178577	-13.93	0	-2.03
10552796	Tsks	testis-specific serine kinase substrate	NM_001077591	-21.55	0	-1.96
10434121	Tssk1	testis-specific serine kinase 1	NM_009435	-6.64	0	-0.68
10434124	Tssk2	testis-specific serine kinase 2	NM_009436	-32.32	0	-4.15
10598882	Uba1	ubiquitin-like modifier activating enzyme 1	NM_009457	-6.11	0	-0.7
10522149	Ube2k	ubiquitin-conjugating enzyme E2K (UBC1 homolog, yeast)	NM_016786	-17.82	0	-1.31
10604078	Upf3b	UPF3 regulator of nonsense transcripts homolog B (yeast)	NM_026573	3.41	0.002	1.07
10444605	Vars	valyl-tRNA synthetase	NM_011690	-16.32	0	-2.01
10591960	Vps26b	vacuolar protein sorting 26 homolog B (yeast)	NM_178027	3.09	0.004	0.32
10575291	Zfp821	zinc finger protein 821	NM_029468	-4.31	0	-0.49
10452082	Znrf4	zinc and ring finger 4	NM_011483	-16.78	0	-1.97
